# Supplementary material
Source: publisher site journal article supplement (https://www.dovepress.com/article/256962)
Supplement: Supplementary file 1 [file get_supplementary_file.php]

## Supplementary Material

**Figure 1.** Graft survival of allografts from donors with and without RF

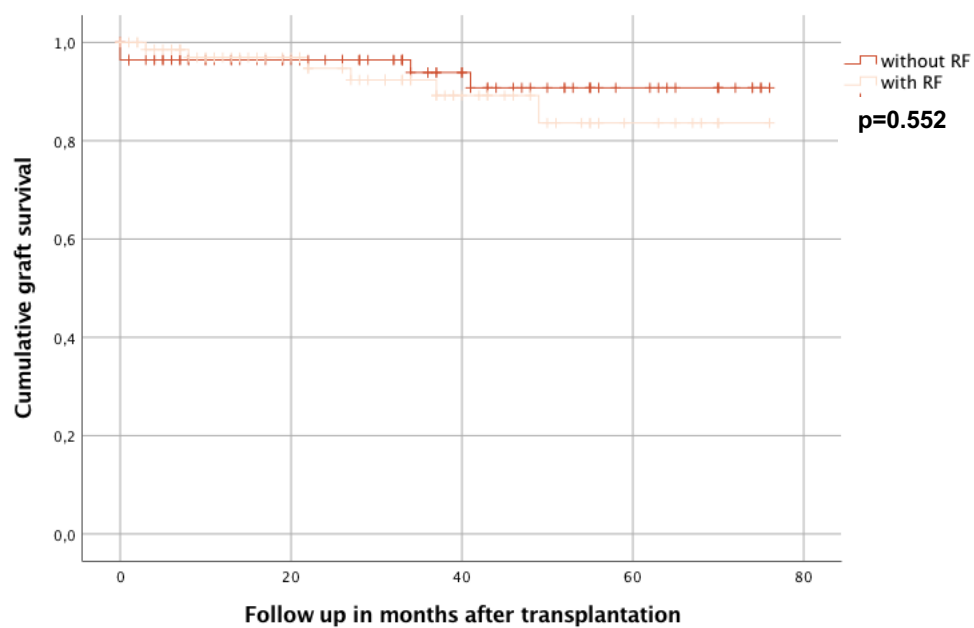

**Abbreviations** RF, risk factor.

**Figure 2.** Graft survival of allografts from donors without RF and “Age over 60”

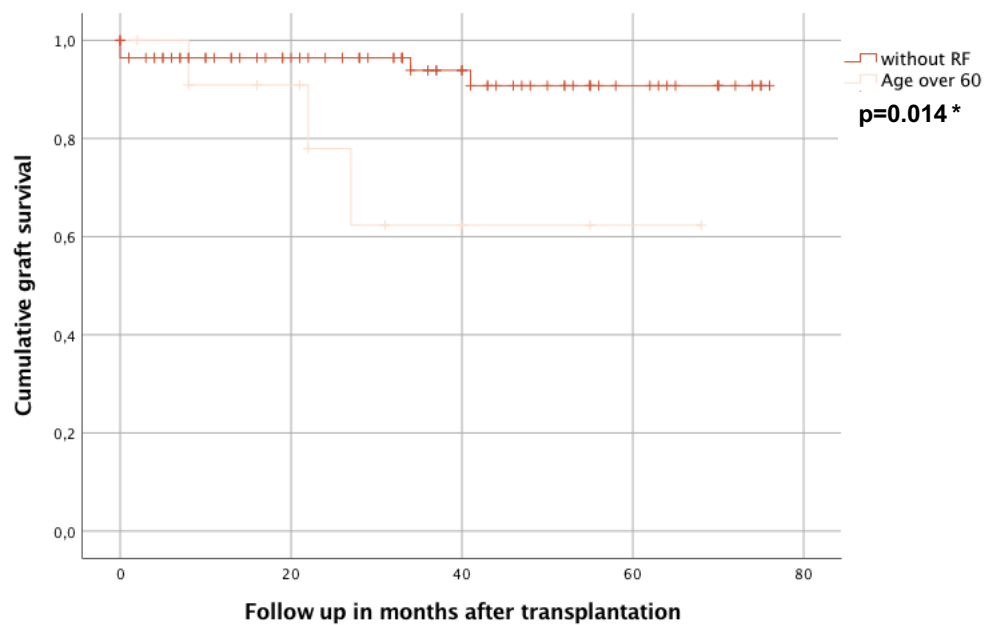

**Abbreviations** RF, risk factor. **Notes:** \* Indicates P-values <0.05.

**Figure 3.** Survival of recipients of allografts from donors and without RF

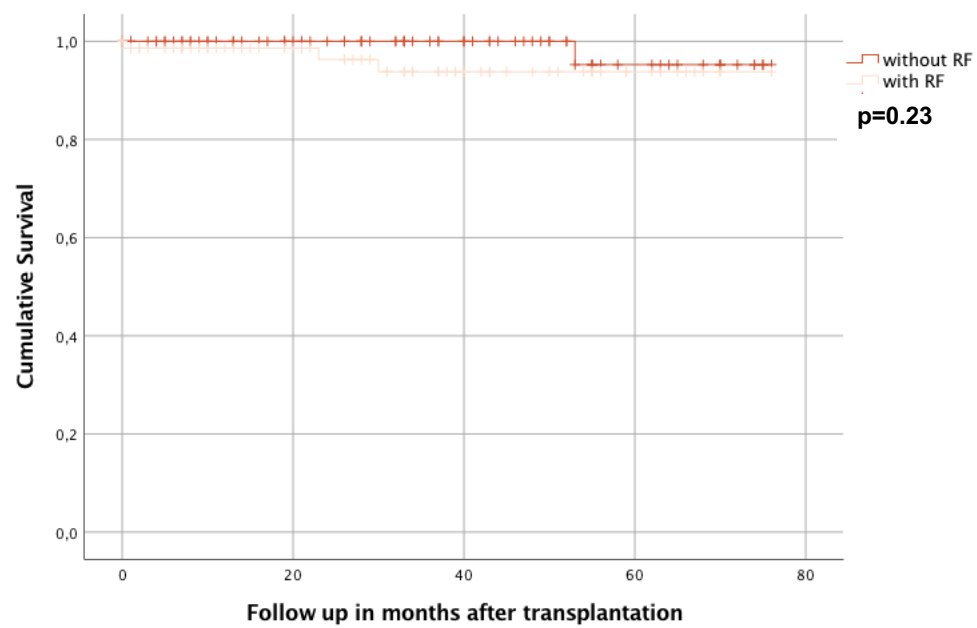

**Abbreviations** RF, risk factor.
